# Supplementary material for: Investigation of Acetylcholine Receptor Diversity in a Nematode Parasite Leads to Characterization of Tribendimidine- and Derquantel-Sensitive nAChRs
Source: PubMed Central journal article supplement (PMC3907359; doi:10.1371/journal.ppat.1003870), 2014-01-30
Supplement: ppat.1003870.s005.pdf [file ppat.1003870.s005.pdf]

## Supporting Information

### Materials and Methods

#### *Ca<sup>2+</sup>-permeability measurements*

For these set of experiments, we increased external Ca<sup>2+</sup> in the recording solution from 1 mM to 10 mM without changing the concentration of the other ions. We used the GHK equation to calculate the permeability ratio,  $P_{Ca}/P_{Na}$ . Due to BAPTA treatment before recordings, we assumed the internal [Ca<sup>2+</sup>] to be negligible; we also assumed permeability to Na and K,  $P_{Na}$  and  $P_K$ , are equal. Ionic activities were used for the calculations (activity coefficients: 0.56 for Ca<sup>2+</sup> and 0.72 for Na<sup>+</sup> and K<sup>+</sup>). Below is the GHK equation used to calculate the calcium permeability ratio, with the activity coefficients for Na<sup>+</sup>, K<sup>+</sup> and Ca<sup>2+</sup> inserted.

$$E_{rev} = RT/F \ln\{(P_{Na} * 0.72[Na]_o + P_K * 0.72[K]_o + 4P' * 0.56[Ca]_o) / (P_{Na} * 0.72[Na]_i + P_K * 0.72[K]_i)\}$$

Where R is the universal gas constant (8.314 JK<sup>-1</sup>mol<sup>-1</sup>); F is Faraday's constant (96485 Cmol<sup>-1</sup>); T is the temperature (room temperature, 298 K); and  $P' = P_{Ca}/P_{Na}\{1/(1+e^{FE_{rev}/RT})\}$ .

Table S1.0 Primers used for the PCR and cloning of *O. dentatum* AChR subunits

| Gene name         | Primer name | Primer sequence                     |
|-------------------|-------------|-------------------------------------|
| <i>Ode-unc-29</i> | F-Hind3     | AAAAAGCTTATGCGTCTCGAACCGTACTTC      |
|                   | R-Apa1      | TTTGGGCCCTAAACCCGTACAGTCATAAAACAAT  |
| <i>Ode-unc-38</i> | F-Xho1      | AAACTCGAGATAGCTGGTTGCAAGTGCGTATT    |
|                   | R-Apa1      | TTTGGGCCCTCTCAACAAAATTGGCCTAATATAC  |
| <i>Ode-unc-63</i> | F-Xho1      | AAACTCGAGATGCTGACGCGACAAGTGTTT      |
|                   | R-Apa1      | TTTGGGCCCTACCCAGCCGGCTGCTCGC        |
| <i>Ode-acr-8</i>  | F-Hind3     | AAACTCGAGCTTGGCTAGCTTAAAATAAGATT    |
|                   | R-Apa1      | TTTGGGCCCAACCATAATACTATACATATCTCAGA |
